# Supplementary material for: Cis-regulatory modes of Ultrabithorax inactivation in butterfly forewings
Source: eLife. 2024 Jan 23;12:RP90846. doi: 10.7554/eLife.90846 (PMC10945631; doi:10.7554/eLife.90846)
Supplement: Supplementary file 1. [file elife-90846-supp1.xlsx]

## Sheet: Table 1
	Species	sgRNA(s)	Inj. Embryos Ninj	L1 larvae Nhat	Pupae or L5 larvae	Adults Nadu	Crispants Nmut	Inj. time h AEL	Cas9:sgRNA ng/µL	Hatching Rate Nhat/Ninj	Crispant Rate Nmut/Ninj
	J. coenia	Antp-Ubx_BE	59	50	50	44	6	2.5-3.5	500 : 250	0.847458	0.101695
			118	40	40	31	6	1.75-2.75	250 : 125	0.338983	0.0508475
			89	44	44	39 *	17	2.25-3.5	500 : 250	0.494382	0.191011
		Total	266	90	134	115	29			0.338346	0.109023
	V. cardui	IT1_sgRNA1	204	67	50	50	2	2023-01-03	250 : 125	0.328431	0.00980392
			108	49	31	31	3	2023-02-03	125 : 62.5	0.453704	0.0277778
			145	60	39	39	2	2.25-3.5	500 : 250	0.413793	0.0137931
		Total	457	176	120	120	7			0.38512	0.0153173
	J. coenia	IT1_sgRNA2	59	40	7	6	0	0.5-2.5	500 : 250	0.677966	0
			124	112	112	110	4	2.25-4.75	500 : 250	0.903226	0.0322581
		Total	183	152	119	116	4			0.830601	0.0218579
	V. cardui	AS5_sgRNA1	334	183	57	52	5	2022-02-03	250 : 125	0.547904	0.0149701
			122	87	2	2	0	2023-02-04	500 : 250	0.713115	0
		Total	456	270	59	54	5			0.592105	0.0109649
	J. coenia	AS5_sgRNA1	309	181	181	181	8	2-4.5	500 : 250	0.585761	0.02589
	J. coenia	Ubx11a2+3 +c5+6	317	18	-	-	2	2023-01-03	500 : 75 ea.	0.0567823	0.00630915
			203	35	0	0	0	1.5-3.5	500 : 75 ea.	0.172414	0
		Total	520	53	-	-	2			0.101923	0.00384615
	V. cardui	Ubx11a2+c5	50	5	3	3	2	4-4.5	500 : 500	0.1	0.04
			151	29	6	5	2	2-2.75	500 :125:125	0.192053	0.013245
			361	18	13	16	6	0.5-2	500 :125:125	0.0498615	0.0166205
		Total	562	52	22	24	10			0.0925267	0.0177936
	V. cardui	Ubx11c5	168	99	27	26	3	3.75-4.75	250 : 125	0.589286	0.0178571
			62	22	9	9	2	0.5-0.75	500 : 250	0.354839	0.0322581
			131	93	8	8	3	1.5-3	500 : 250	0.709924	0.0229008
			114	63	20	20	6	3.5-4.5	500 : 250	0.552632	0.0526316
		Total	475	277	64	63	14			0.583158	0.0294737
	V. cardui	Ubx11b9	32	18	6	5	1	1.25-2.25	500 : 250	0.5625	0.03125
			63	49	9	6	1	3.5-4.5	500 : 250	0.777778	0.015873
		Total	95	67	15	11	2			0.705263	0.0210526
	J. coenia	Ubx11b9	41	13	13	13	3	2.5-4	125 : 62.5	0.317073	0.0731707
			48	21	14	14	1	2022-02-03	250 : 125	0.4375	0.0208333
		Total	89	34	27	27	4			0.382022	0.0449438
	* : upper estimate, includes 16 fifth instars larvae that were dissected for immunostainings, of which 7 were mutants (as evidenced by ectopic UbdA in forewings), and 3 dissected mutant pupae
																"cold batch"
														11 wt adults	9 wt l5
														4 mut adults	7 mut l5	3 mut pupae	+3 more???

## Sheet: Table S1
Species	sgRNA name	Target Sequence (5' to 3') PAM sequence not shown
J. coenia	Antp-Ubx_BE	CTCGAATATGGAGATATCGG
	UbxCRE11a3	ACGGACCTCCGCTTTCCTGG
	UbxCRE11c6	AACTGGTGCAGTGCCTTGTA
J. coenia + V. cardui	UbxCRE11a2	CTACTCTGTTCGGACATTCG
	UbxCRE11c5	GCTGCCGCGAGTCTGAATCG
	UbxCRE11b9	TTCATGTATGAACCATGACG
	UbxIT1#1	CCTTCGCATAAGTTCGGATAGG
	Bxd1	TATCGGTCGTTCGTCACACA
V. cardui	UbxIT1#2	CTCGGCTATGTGTCGAGGGC
											50
											55

## Sheet: Summary figure
	Dorsal	Ventral
Antp_Ubx_BE			FW
			HW
IT1	9	1	FW
	2	2	HW
AS5'	1	0	FW
	0	12	HW
Ubx11a2c5	1	1	FW
	8	9	HW
11b9			FW
			HW
Ubx11c5	4	2	FW
	8	7	HW
Species	Guide	Egg Timer (hrs)	Concentration	Nmut/Ninj (%)
Junonia coenia	VcUbxFW1	2.5-3.5	500 : 250	10.17	7.63
Junonia coenia		1.75-2.75	250 : 125	5.09
Junonia coenia	IT1_sgRNA2	0.5-2.5h	500 : 250	0	3.23
Junonia coenia		2.25-4.75	500 : 250	3.23
Junonia coenia	AS5_sgRNA1	2-4.5	500 : 250	2.59	2.59
Junonia coenia	Ubx11a2+3,c5+6	2023-01-03	500 :125:125	0.64	0.64
Junonia coenia		1.5-3.5	500 : 250 : 250	0
Junonia coenia	11b9	2.5-4	125 : 62.5	7.32	4.705
Junonia coenia		2022-02-03	250 : 125	2.09
Species	Guide	Egg Timer (hrs)	Concentration	Nmut/Ninj (%)
Vanessa cardui	IT1_sgRNA1	1-3h	250 : 125	0.99	1.71667
Vanessa cardui		2023-02-03	125 : 62.5	2.78
Vanessa cardui		2.25-3.5	500 : 250	1.38
Vanessa cardui	IT1_sgRNA2	2.25-4.75	500 : 250	0	0
Vanessa cardui	AS5_sgRNA1	2022-02-03	250 : 125	1.5	1.5
Vanessa cardui		2023-02-04	500 : 250	0
Vanessa cardui	Ubx11a2c5	4-4.5	500 : 500	4	2.33333
Vanessa cardui		2-2.66	500 :125:125	1.33
Vanessa cardui		0.5-2	500 :125:125	1.67
Vanessa cardui	11b9	1.25-2.25	500 : 250	3.13	2.36
Vanessa cardui		3.5-4.5	500 : 250	1.59
Vanessa cardui	Ubx11c5	3.75-4.75	250 : 125	1.79	3.1475
Vanessa cardui		0.5-0.75	500 : 250	3.23
Vanessa cardui		1.5-3	500 : 250	2.3
Vanessa cardui		3.5-4.5	500 : 250	5.27

## Sheet: rough work
WILL BE DELETED LATER
2022-09-19	16:20:00	phenol red	∼2ul	1120	OK injection. HW damaged a little upon putting it back in place	8V, 280ms, 5 pulses, 100ms interval	Luca	Necrotic. Dead
2022-09-19	16:45:00	phenol red	∼2ul	1120	OK injection.	8V, 280ms, 5 pulses, 100ms interval	Amu	2022-09-30	Injection damage. Wings stored
2022-09-19	17:00:00	phenol red	∼2ul	1120	Bad injection, damaged wings	8V, 280ms, 5 pulses, 100ms interval	Amu	Necrotic. Dead
2022-09-19	17:26:00	phenol red	∼2ul	1120	Bad injection, damaged wings	8V, 280ms, 5 pulses, 100ms interval	Luca	Necrotic. Dead
2022-09-19	17:37:00	phenol red	∼2ul	1120	OK injection.	8V, 280ms, 5 pulses, 100ms interval	Amu	Necrotic. Dead
2022-09-20	16:52:00	phenol red	∼2ul	1120	Bad injection, damaged wings. few piercings for injection	8V, 280ms, 5 pulses, 100ms interval	Amu	Necrotic. Dead
2022-09-20	16:52:00	phenol red	∼2ul	1120	Bad injection. few piercings for injection	8V, 280ms, 5 pulses, 100ms interval	Amu	Necrotic. Dead
2022-09-20	17	phenol red	∼2ul	1120	Bad injection. few piercings for injection	8V, 280ms, 5 pulses, 100ms interval	Amu	Necrotic. dead
2022-09-20	17:15:00	phenol red	∼2ul	1120	Good injection, pierced wing twice but got mix in. poked FW	8V, 280ms, 5 pulses, 100ms interval	Amu	2022-10-01	Failed eclosion. Hard to tell. Not stored, wings not inflated and damaged
2022-09-20	17:25:00	phenol red	∼2ul	1120	Not great, quick. Not a lot of injection mix	8V, 280ms, 5 pulses, 100ms interval	Luca	2022-09-30	injection damage. Wings stored
2022-09-20	17:45:00	Fz2 siRNA8	∼2ul	1120	Mangled. Unhappy pupa. Tip of HW damaged	8V, 280ms, 5 pulses, 100ms interval	Luca	Necrotic. Dead
2022-09-20	18:05:00	Fz2 siRNA8	∼1.6ul	1120	OK injection, tip of HW damaged.	8V, 280ms, 5 pulses, 100ms interval	Amu	Necrotic. Dead
2022-09-20	18:15:00	Fz2 siRNA8	∼2ul	1120	OKish injection. Damaged pupa under the wings.	8V, 280ms, 5 pulses, 100ms interval	Luca	Necrotic. Dead
2022-09-20	18:26:00	Fz2 siRNA8	∼2ul	1120	Good injection. Slightly poked HW	8V, 280ms, 5 pulses, 100ms interval	Amu	2022-09-30	Injection damage. Nothing pattern related that seems obvious. Wings stored		Scanned 3/31/23_amu
2022-09-20	18:45:00	Fz2 siRNA8	∼2ul	1120	Decent injection. Slightly damaged HW. Placed back OK	8V, 280ms, 5 pulses, 100ms interval	Luca	2022-10-01	Failed eclosion. Hard to tell. Not stored, wings not inflated and damaged
2022-09-21	15:42:00	Fz2 siRNA7+8	∼2ul	560	Amu broke the FW. Luca injected. Bleeding to death. Haemolymph galore	8V, 280ms, 5 pulses, 100ms interval	Amu/Luca	Necrotic. Dead
2022-09-21	15:56:00	Fz2 siRNA7+8	∼2ul	560	FW cureld, distalHW damaged	8V, 280ms, 5 pulses, 100ms interval	Luca			Injected on left wing
2022-09-21	16:31:00	Fz2 siRNA7+8	∼2ul	560	burned HW	8V, 280ms, 5 pulses, 100ms interval	Luca	Necrotic. Dead		Injected left.
2022-09-21	16:57:00	Fz2 siRNA7+8	∼2ul	560	OK injection	8V, 280ms, 5 pulses, 100ms interval	Amu	Necrotic. Dead		Injected right
2022-09-21	17:30:00	Fz2 siRNA7+8	∼2ul	560	"decent" haemolymh leakedbut good injection	8V, 280ms, 5 pulses, 100ms interval	Luca	Necrotic. Dead		Injected left.
2022-09-21	17:45:00	Fz2 siRNA7	∼2ul	1120	probably won't die. broke anterior HW	8V, 280ms, 5 pulses, 100ms interval	Amu			Injected left.
2022-09-22	16:15:00	Ubx siRNA7+8	∼2ul	560	HW damaged. otherwise well. 30min post pup	8V, 280ms, 5 pulses, 100ms interval	Luca	Necrotic. Dead		30minPP
2022-09-22	16:40:00	Ubx siRNA7+8	∼2ul	560	Difficult to inject. 40min post pup. Easier to peel. Not great.	8V, 280ms, 5 pulses, 100ms interval	Amu	Necrotic. Dead		40minPP
2022-09-22	NA	Ubx siRNA7+8	∼2ul	560	Used cardboard for FW supprot. FW curling. Haemolymph leakage. Edge of folding folded, didnt seal propoerly. Abundant HW poking	8V, 280ms, 5 pulses, 100ms interval	Ling	Necrotic. Dead		40minPP
2022-09-22	15:13:00	Ubx siRNA7+8	∼2ul	560	Used cardboard for FW supprot. okay injection	8V, 280ms, 5 pulses, 100ms interval	Luca	Necrotic. Dead	Emerged with crinkly wings. wings stored	53minPP
2022-09-22	NA	Ubx siRNA7+8	∼2ul	560	Best one so far. Easier to peel. Bloody Efing amazing. FW curled when sealed tho.	8V, 280ms, 5 pulses, 100ms interval	Amu	ded		1hr 10min.
2022-09-22	17:43:00	Ubx siRNA7+8	∼2ul	560	"Probably my best one". FW bent a little when putting back	8V, 280ms, 5 pulses, 100ms interval	Luca	Necrotic. Dead		1h10min
2022-09-22	18:04:00	Ubx siRNA7+8	∼2ul	560	Amu poked HW, could not get the needle in, Luca tookover and finished in 3 minutes	8V, 280ms, 5 pulses, 100ms interval	Amu/Luca	Necrotic. Dead		1hr10min
2022-09-22		Ubx siRNA7+8	∼2ul	560	Lots of haemolymph damaged HW not good.	8V, 280ms, 5 pulses, 100ms interval	Luca	Necrotic. Dead		1hr14min
2022-09-22	18:35:00	Ubx siRNA7+8	∼2ul	560	pretty well	8V, 280ms, 5 pulses, 100ms interval	Ling	Necrotic. Dead		1hr30min
2022-09-27	18:20:00	Fz2 siRNA7+8	∼2ul	560	Well. HW good. FW folded while sealing	8V, 280ms, 5 pulses, 100ms interval	Luca	Necrotic. Dead		1hr
2022-09-27	18:30:00	Fz2 siRNA7+8	∼2ul	560	Decent. Folded forewing.	8V, 280ms, 5 pulses, 100ms interval	Amu			1hr
2022-09-27	18:45:00	Fz2 siRNA7+8	∼2ul	560	Decent. Folded forewing.	8V, 280ms, 5 pulses, 100ms interval	Luca			50min
2022-09-27	19:05:00	Fz2 siRNA7+8	∼2ul	560	V good. Best one yet.	8V, 280ms, 5 pulses, 100ms interval	Amu			50min
2022-09-27	9.22	Fz2 siRNA7+8	∼2ul	560	not great. bleeding. lot of haemolymh lost	8V, 280ms, 5 pulses, 100ms interval	Luca	Necrotic. Dead		47min
2022-09-29	14:00:00	Ubx siRNA7+8	∼2ul	560	too old, not great. FW ripped, HW hard to peel off	8V, 280ms, 5 pulses, 100ms interval	Luca	Necrotic. Dead		1h30min. Little too old
2022-09-29	14:00:00	Ubx siRNA7+8	∼2ul	560	OK injection.	8V, 280ms, 5 pulses, 100ms interval	Luca			NA

## Sheet: Antp_Ubx-BE
o	Injection Species	Guide Species	Guide	Egg Count	L1 larvae	Pupae	Adults (total)	adults w/ Phenotype	Egg Timer (hrs)	Concentration	Egg Hatching Rate(%)	Survival Rate (%)	Mutation rate (%)	Phenotype Observation	Picture/Label
Amruta_1March2023	Junonia coenia	Vanessa cardui	VcUbxFW1	35	0	14	14	-	1.25-1.75	250 : 125
Amruta_1March2023	Junonia coenia	Vanessa cardui	VcUbxFW1	46	4	18	15	2	2.25-2.75	250 : 125
Amruta_1March2023	Junonia coenia	Vanessa cardui	VcUbxFW1	19	3	19	13	2	2.25-2.75	250 : 125
Amruta_1March2023	Junonia coenia	Vanessa cardui	VcUbxFW1	57	20	-	-	-	2.25-2.75	125 : 62.5
Amruta_1March2023	Junonia coenia	Vanessa cardui	VcUbxFW1	58	16	12	10	0	2.75-3.15	500 : 250
Amruta_2March2023	Junonia coenia	Vanessa cardui	VcUbxFW1	46	23	-	-	-	2023-01-02	250 : 125
Amruta_2March2023	Junonia coenia	Vanessa cardui	VcUbxFW1	37	22	-	-	-	2023-02-03	250 : 125
Amruta_2March2023	Junonia coenia	Vanessa cardui	VcUbxFW1	51	28	-	-	-	2023-02-03	250 : 125
Amruta_2March2023	Junonia coenia	Vanessa cardui	VcUbxFW1	59	44	50	44	6	2.5-3.5	500 : 250
Amruta_13Feb2023	Vanessa cardui	Vanessa cardui	VcUbxFW1+2	76	54	1	1	1	2.5-3	250 : 125
Amruta_13Feb2023	Vanessa cardui	Vanessa cardui	VcUbxFW1+2	56	44	2	2	1	4-4.5	125 : 62.5
Amruta_25Jan2023	Vanessa cardui	Junonia coenia	VcUbxFW1	53	4	0	3	3	1	1.75-2.25	250 : 125
Amruta_1March2023	Junonia coenia	Vanessa cardui	VcUbxFW1	46	4	18	15	2	2.25-2.75	250 : 125
Amruta_1March2023	Junonia coenia	Vanessa cardui	VcUbxFW1	19	3	19	13	3	2.25-2.75	250 : 125
Amruta_25Jan2023	Vanessa cardui	Junonia coenia	VcUbxFW1	53	4	3	3	1	1.75-2.25	250 : 125
				118	11	40	31	6	1.75-2.75	250 : 125
		Species	Guide	Injected Embryos Ninj	L1 larvae	Pupae	Adults (total)	adults w/ Phenotype	Egg Timer (hrs)	Concentration	Crispant Rate Nmut/Ninj (%)
Amruta_2March2023		Junonia coenia	VcUbxFW1	59	44	50	44	6	2.5-3.5	500 : 250
				118	11	40	31	6	1.75-2.75	250 : 125
			TOTAL	177				12			6.8

## Sheet: Ubx_IT1
o	Injection Species	Guide Species	Guide	Egg Count	L1 larvae	Black Eggs/Dead Hatchlings	Pupae	Adults (total)	adults w/ Phenotype	Egg Timer (hrs)	Concentration	Egg Hatching Rate(%)	Survival Rate (%)	Mutation rate (%)	Phenotype Observation	Picture/Label
Amruta_5Aug2022	Vanessa cardui	Vanessa cardui	PS4sgRNA1	89	40	-	-	-	-	1-2.5	500 : 250	44.94	#VALUE!	lot of death due to disease
Amruta_5Aug2022	Vanessa cardui	Vanessa cardui	PS4sgRNA1	40	28	-	-	-	-	1-2.75	500 : 250	70	#VALUE!	lot of death due to disease
Amruta_5Aug2022	Vanessa cardui	Vanessa cardui	PS4sgRNA1	40	13	8	-	-	-	2-3.5	250 : 125	32.5	#VALUE!	lot of death due to disease
Amruta_5Aug2022	Vanessa cardui	Vanessa cardui	PS4sgRNA1	49	11	9	-	-	-	2-3.5	250 : 125	22.44	#VALUE!	lot of death due to disease
Amruta_5Oct2022	Vanessa cardui	Vanessa cardui	PS4sgRNA1	57	20	13	16	16	1	2022-01-02	250 : 125	35.08	80
Amruta_5Oct2022	Vanessa cardui	Vanessa cardui	PS4sgRNA1	44	10	13	6	6	1	1.25-2.25	250 : 125	22.72	60
Amruta_5Oct2022	Vanessa cardui	Vanessa cardui	PS4sgRNA1	39	18	9	13	13	0	1.5-2.5	250 : 125	46.15	72.22
Amruta_5Oct2022	Vanessa cardui	Vanessa cardui	PS4sgRNA1	35	12	7	10	10	0	1.5-2.5	250 : 125	34.28	83.33
Amruta_5Oct2022	Vanessa cardui	Vanessa cardui	PS4sgRNA1	29	7	17	5	5	0	1.75-2.75	250 : 125	24.13	71.42
Amruta_5Oct2022	Vanessa cardui	Vanessa cardui	PS4sgRNA1	57	31	13	18	18	1	2022-02-03	125 : 62.5	54.38	58.06
Amruta_5Oct2022	Vanessa cardui	Vanessa cardui	PS4sgRNA1	51	18	16	13	13	2	2022-02-03	125 : 62.5	35.29	72.22
Amruta_5Oct2022	Vanessa cardui	Vanessa cardui	PS4sgRNA1	55	24	16	16	16	1	2.25-3.25	500 : 250	43.63	66.66
Amruta_5Oct2022	Vanessa cardui	Vanessa cardui	PS4sgRNA1	90	36	17	23	23	1	2.5-3.5	500 : 250	40	63.88
Amruta_27June2022	Vanessa cardui	Vanessa cardui	PS4sgRNA2	58	20	4	5	5	0	0.5-1	500 : 250	34.48	25	0
Amruta_27June2022	Vanessa cardui	Vanessa cardui	PS4sgRNA2	64	34	3	1	0	0	2.25-4.75	500 : 250	53.12	0	#DIV/0!
Amruta_27June2022	Vanessa cardui	Vanessa cardui	PS4sgRNA2	66	49	0	-	-	-	1.5-2.25	250 : 125	74.24	#VALUE!	#VALUE!
Amruta_27June2022	Vanessa cardui	Vanessa cardui	PS4sgRNA2	81	48	1	-	-	-	1.75-2.25	250 : 125	59.25	#VALUE!	#VALUE!
Amruta_27June2022	Vanessa cardui	Vanessa cardui	PS4sgRNA2	72	47	1	-	-	-	2-2.75	125 : 75	65.27	#VALUE!	#VALUE!
Amruta_27June2022	Vanessa cardui	Vanessa cardui	PS4sgRNA2	64	50	0	-	-	-	2.25-3	125 : 75	78.12	#VALUE!	#VALUE!
					516									#DIV/0!
Amruta_23June2022	Junonia coenia	Vanessa cardui	PS4sgRNA2	59	40	24	7	6	0	0.5-2.5h	500 : 250	67.79	15	0
Amruta_23June2022	Junonia coenia	Vanessa cardui	PS4sgRNA2	44	27	20	51	50	2	2.25-4.25	500 : 250	61.36	185.18	4			MORE ADULTS THAN INJECTED
Amruta_23June2022	Junonia coenia	Vanessa cardui	PS4sgRNA2	80	65	50	61	60	2	2.75-4.75	500 : 250	81.25	92.3	3.33333
o	Species	Guide	Injected Embryos Ninj	L1 larvae	Pupae	Adults (total)	adults w/ Phenotype	Egg Timer (hrs)	Concentration	Crispant Rate Nmut/Ninj (%)
	Vanessa cardui	IT1_sgRNA1	204	67	50	50	2	1-3h	250 : 125	1
			108	49	31	31	3	2023-02-03	125 : 62.5	2.8
			145	60	39	39	2	2.25-3.5	500 : 250	1.4		34.48	25
		TOTAL	457	176	120	120	7			1.6
	Junonia coenia	IT1_sgRNA2	59	40	7	6	0	0.5-2.5h	500 : 250	0
			124	92	112	110	4	2.25-4.75	500 : 250	3.3
		TOTAL	183	132	119	116	4			2.2
														Mutation rate (%)	Phenotype Observation	Picture/Label

## Sheet: Ubx_AS5
o	Injection Species	Guide Species	Guide	Egg Count	L1 larvae	Black Eggs/Dead Hatchlings	Pupae	Adults (total)	adults w/ Phenotype	Egg Timer (hrs)	Concentration	Egg Hatching Rate(%)	Survival Rate (%)	Mutation rate (%)	Phenotype Observation	Picture/Label
Amruta_10Aug2022	Vanessa cardui	Vanessa cardui	Bxd1	122	87	14	2	2	0	2022-02-03	500 : 250	71.31	2.29
Amruta_10Aug2022	Vanessa cardui	Vanessa cardui	Bxd1	86	68	9	4	2	0	2022-02-03	250 : 125	79.06	2.94
Amruta_10Aug2022	Vanessa cardui	Vanessa cardui	Bxd1	48	38	5	22	20	5	2.25-3.25	250 : 125	79.16	52.63				**Only 4 pinned, two of them don't seem to have mutations
Amruta_10Aug2022	Vanessa cardui	Vanessa cardui	Bxd1	69	37	21	-	-	-	2.5-3.5	250 : 125	53.62					lot of death due to disease
Amruta_10Aug2022	Vanessa cardui	Vanessa cardui	Bxd1	145	116	10	-	-	-	3.25-4.25	125 : 62.5	80					lot of death due to disease
Amruta_10Aug2022	Vanessa cardui	Vanessa cardui	Bxd1	101	72	18`	-	-	-	3.25-4.25	125 : 62.5	71.28					lot of death due to disease
Amruta_11Oct2022	Vanessa cardui	Vanessa cardui	Bxd1	56	13	6	1	1	0	2.75-3.75	250 : 125	23.21
Amruta_11Oct2022	Vanessa cardui	Vanessa cardui	Bxd1	49	14	3	1	0	0	2022-02-03	250 : 125	28.57
Amruta_12Oct2022	Vanessa cardui	Vanessa cardui	Bxd1	45	27	4	18	18	0	2022-02-03	250 : 125	60
Amruta_12Oct2022	Vanessa cardui	Vanessa cardui	Bxd1	50	23	8	11	11	0	2022-02-03	250 : 125	46
Amruta_12Oct2022	Junonia coenia	Vanessa cardui	Bxd1	26	6	3	1	1	0	2022-02-04	250 : 125	23.07
Amruta_17Oct2022	Junonia coenia	Vanessa cardui	Bxd1	54	42	0	181	180	8	2.25-3.35	250 : 125	77.77
Amruta_17Oct2022	Junonia coenia	Vanessa cardui	Bxd1	72	33	0				2.75-3.75	250 : 125	45.83
Amruta_17Oct2022	Junonia coenia	Vanessa cardui	Bxd1	31	20	3				3.25-4.25	500 : 250	64.51
Amruta_17Oct2022	Junonia coenia	Vanessa cardui	Bxd1	67	45	2				3.5-4.5	500 : 250	67.16
Amruta_17Oct2022	Junonia coenia	Vanessa cardui	Bxd1	59	35	2				2-3.5	250 : 125	59.32
				1080	676								0.625926
o	Species	Guide	Injected Embryos Ninj	L1 larvae	Pupae	Adults (total)	adults w/ Phenotype	Egg Timer (hrs)	Concentration	Crispant Rate Nmut/Ninj (%)
	Vanessa cardui	AS5_sgRNA1	334	183	57	52	5	2022-02-03	250 : 125	1.5
			122	87	2	2	0	2023-02-04	500 : 250	0
	TOTAL		456	270	59	54	5			1.1
	Junonia coenia		309	181	182	181	8	2-4.5	500 : 250	2.6

## Sheet: CRM11ac
o	Injection Species	Guide	Egg Count	L1 larvae	Pupae	Adults (total)	adults w/ Phenotype	Egg Timer (hrs)	Concentration	Egg Hatching Rate(%)	Survival Rate (%)	Mutation rate (%)
Amu_6Oct2021	Junonia coenia	Ubx11a2+3,c5+6	187	10	3	1	1	2022-01-03	500 : 250 : 250	5.34759
Amu_6Oct2021	Junonia coenia	Ubx11a2+3,c5+6	130	8	-	-	1	1.5-3	500 : 250 : 250	6.15385
Amu_6Oct2021	Junonia coenia	Ubx11a2+3,c5+6	203	35	0	0	0	1.5-3.5	500 : 250 : 250	17.2414	0	#DIV/0!
Amu_15Oct2021	Junonia coenia	Ubx11a2+3,c5+6	151	22	-	-	-	2022-01-03	500 : 250 : 250	14.5695	#VALUE!	#VALUE!
Amu_15Oct2021	Junonia coenia	Ubx11a2+3,c5+6	183	20	-	-	-	1.5-3	500 : 250 : 250	10.929	#VALUE!	#VALUE!
Amruta_28July2021	Vanessa cardui	Ubx11a2c5	50	5	3	3	2	4-4.5	500 : 500	10
Amu_3Aug2021	Vanessa cardui	Ubx11a2c5	121	6	13	11	3	1.5-2	500 : 250	#REF!
Amu_3Aug2021	Vanessa cardui	Ubx11a2c5	51	0	0	0	0	0.25-0.5	500 : 250	#REF!
Amu_3Aug2021	Vanessa cardui	Ubx11a2c5	132	6	NA	NA	2	0.5-1	500 : 250	4.54545
Amu_3Aug2021	Vanessa cardui	Ubx11a2c5	111	6	NA	2	0	2.5-3.5	500 : 250	5.40541
Amu_3Aug2021	Vanessa cardui	Ubx11a2c5	142	6	8	8	0	1-1.25	500 : 250	4.22535
Amu_3Aug2021	Vanessa cardui	Ubx11a2c5	108	6	NA	5	1	2022-01-02	500 : 250	5.55556
Amu_11Aug2021	Vanessa cardui	Ubx11a2c5	254	118	0	0	0	8.5-8.83	500 : 250	46.4567
Amu_11Aug2021	Vanessa cardui	Ubx11a2c5	305	89	17	17	0	8.75-9	500 : 250	29.1803
Amu_11Aug2021	Vanessa cardui	Ubx11a2c5	234	91	0	0	0	5.75-7.15	500 : 250	38.8889
Amu_11Aug2021	Vanessa cardui	Ubx11a2c5	237	12	0	0	0	5.75-6.15	500 : 250	5.06329
Amu_11Aug2021	Vanessa cardui	Ubx11a2c5	230	63	0	0	0	5.75-6.15	500 : 250	27.3913
Amu_13Sept2021	Vanessa cardui	Ubx11a2c5	126	30	-	-	-	2022-02-03	500 : 250 : 250	23.8095
Amu_13Sept2021	Vanessa cardui	Ubx11a2c5	125	26	1	1	0	2022-02-03	500 : 250 : 250	20.8
Amu_17Sept2021	Vanessa cardui	Ubx11a2c5	151	29	6	5	2	2-2.66	500 : 250 : 250	19.2053
Amu_17Sept2021	Vanessa cardui	Ubx11a2c5	139	61	6	4	0	0.5-1	500 : 250 : 250	43.8849
Amu_17Sept2021	Vanessa cardui	Ubx11a2c5	182	29	-	-	0	2-2.33	500 : 250 : 250	15.9341
Amu_17Sept2021	Vanessa cardui	Ubx11a2c5	229	52	-	-	0	0.5-1.25	500 : 250 : 250	22.7074
Amu_6Oct2021	Junonia coenia	Ubx11a2+3,c5+6	187	10	3	1	1	2022-01-03	500 : 250 : 250	5.34759
Amu_6Oct2021	Junonia coenia	Ubx11a2+3,c5+6	130	8	-	-	1	1.5-3	500 : 250 : 250	6.15385
			317	18	-	-	2	2023-01-03	500 :125:125
Amruta_28July2021	Vanessa cardui	Ubx11a2c5	50	5	3	3	2	4-4.5	500 : 500	10
Amu_3Aug2021	Vanessa cardui	Ubx11a2c5	121	6	13	11	3	1.5-2	500 :125:125	#REF!
Amu_3Aug2021	Vanessa cardui	Ubx11a2c5	132	6	NA	NA	2	0.5-1	500 :125:125	4.54545
Amu_3Aug2021	Vanessa cardui	Ubx11a2c5	108	6	NA	5	1	2022-01-02	500 :125:125	5.55556
			361	18	13	16	6	0.5-2	500 :125:125
o	Injection Species	Guide	Injected Embryos Ninj	L1 larvae	Pupae	Adults (total)	adults w/ Phenotype	Egg Timer (hrs)	Concentration	Egg Hatching Rate(%)	Survival Rate (%)	crispant rate (%)
	Junonia coenia	Ubx11a2+3,c5+6	317	18	-	-	2	2023-01-03	500 :125:125	5.67823		0.7
			203	35	0	0	0	1.5-3.5	500 : 250 : 250	17.2414	0	0
		TOTAL	520	53	0	0	2					0.4
	Vanessa cardui	Ubx11a2c5	50	5	3	3	2	4-4.5	500 : 500	10		4
			151	29	6	5	2	2-2.66	500 :125:125	19.2053		1.4
			361	18	13	16	6	0.5-2	500 :125:125	4.98615		1.7
		TOTAL	562	52	22	24	10					1.8

## Sheet: CRM11b
	Injection Species	Guide	Egg Count	L1 larvae	Pupae	Adults (total)	adults w/ Phenotype	Egg Timer (hrs)	Concentration	Egg Hatching Rate(%)	Survival Rate (%)	Mutation rate (%)	Phenotype Observation	Picture/Label
Amruta_31May2022	Vanessa cardui	Ubx11b9	68	3	3	3	0	45min-1h10min	500 : 250
Amruta_31May2022	Vanessa cardui	Ubx11b9	61	12	3	3	0	20-30min	500 : 250
Amruta_31May2022	Vanessa cardui	Ubx11b9	47	2	2	2	0	25-35min	500 : 250
Amruta_31May2022	Vanessa cardui	Ubx11b9	60	8	6	5	0	30-40min	500 : 250
KVH_17May2022	Vanessa cardui	Ubx11b9	20	10	8	8	0	.75-1.75h AEL	500 : 250
KVH_17May2022	Vanessa cardui	Ubx11b9	25	12	8	8	0	.75-1.75h AEL	500 : 250
KVH_17May2022	Vanessa cardui	Ubx11b9	35	21	5	5	0	1-2h AEL	500 : 250
KVH_17May2022	Vanessa cardui	Ubx11b9	22	12	5	5	0	1-2h AEL	500 : 250
KVH_17May2022	Vanessa cardui	Ubx11b9	32	18	6	5	1	1.25-2.25 h AEL	500 : 250
Amruta_11Aug2022	Vanessa cardui	Ubx11b9	63	49	9	6	1	3.5-4.5	500 : 250
Amruta_20Oct2022	Junonia coenia	Ubx11b9	48	21	14	14	1	2022-02-03	250 : 125
Amruta_20Oct2022	Junonia coenia	Ubx11b9	28	11	8	8	0	2-3.5	250 : 125
Amruta_20Oct2022	Junonia coenia	Ubx11b9	60	26	10	10	0	2.25-3.5	125 : 62.5
Amruta_20Oct2022	Junonia coenia	Ubx11b9	41	12	13	13	3	2.5-4	125 : 62.5
	Injection Species	Guide	Injected Embryos Ninj	L1 larvae	Pupae	Adults (total)	adults w/ Phenotype	Egg Timer (hrs)	Concentration	Survival Rate (%)	crispant rate (%)		Phenotype Observation	Picture/Label
	Junonia coenia	11b9	41	12	13	13	3	2.5-4	125 : 62.5	31.7073	7.4
			48	21	14	14	1	2022-02-03	250 : 125	29.1667	2.1
		TOTAL	89	33	27	27	4			30.3371	4.5
	Vanessa cardui	11b9	32	18	6	5	1	1.25-2.25	500 : 250	15.625	3.2
			63	49	9	6	1	3.5-4.5	500 : 250	9.52381	1.6
		TOTAL	95	67	15	11	2				2.2
Amruta_20Oct2022	Junonia coenia	Ubx11b9								43.75
Amruta_20Oct2022	Junonia coenia	Ubx11b9								29.2683

## Sheet: CRM11c
o	Injection Species	Guide	Egg Count	L1 larvae	Pupae	Adults (total)	adults w/ Phenotype	Egg Timer (hrs)	Concentration	Egg Hatching Rate(%)	Survival Rate (%)	Mutation rate (%)	Phenotype Observation	Picture/Label
Amruta_14June2022	Vanessa cardui	Ubx11c5	87	45	4	4	0	40-50min	500 : 250	51.7241	8.88889	0
Amruta_14June2022	Vanessa cardui	Ubx11c5	95	35	1	1	0	40-50min	500 : 250	36.8421	2.85714	0
Amruta_14June2022	Vanessa cardui	Ubx11c5	15	9	0	0	0	50-60min	500 : 250	60	0	#DIV/0!
Amruta_3Oct2022	Vanessa cardui	Ubx11c5	55	34	8	8	3	3.5-4.5	500 : 250	61.8182
Amruta_3Oct2022	Vanessa cardui	Ubx11c5	59	29	12	12	3	3.5-4.5	500 : 250	49.1525
Amruta_3Oct2022	Vanessa cardui	Ubx11c5	94	59	14	13	3	3.75-4.75	250 : 125	62.766
Amruta_3Oct2022	Vanessa cardui	Ubx11c5	74	40	13	13	0	3.75-4.75	250 : 125	54.0541
KVH_17Jun2022	Vanessa cardui	Ubx11c5	62	22	9	9	2	0.5-0.75	500 : 250	35.4839
KVH_3Jun2022	Vanessa cardui	Ubx11c5	47	25	8	8	2	1.5-2h AEL	500 : 250	53.1915
Kelsey_29Sept2022	Vanessa cardui	Ubx11c5	84	68			1	2-3h	500 : 250	80.9524
	Species	Guide	Injected Embryos Ninj	L1 larvae	Pupae	Adults (total)	adults w/ Phenotype	Egg Timer (hrs)	Concentration	Survival Rate (%)	Mutation rate (%)
	Vanessa cardui	Ubx11c5	168	99	27	26	3	3.75-4.75	250 : 125	15.4762
			62	22	9	9	2	0.5-0.75	500 : 250	14.5161
			131	93	8	8	3	1.5-3	500 : 250	6.10687
			114	63	20	20	6	3.5-4.5	500 : 250	17.5439
		TOTAL	475	277	64	63	14				3
Amruta_3Oct2022	Vanessa cardui	Ubx11c5	55	34	8	8	4	3.5-4.5	500 : 250	61.8182
Amruta_3Oct2022	Vanessa cardui	Ubx11c5	59	29	12	12	3	3.5-4.5	500 : 250	49.1525
			114	63	20	20	7	3.5-4.5	500 : 250
Amruta_3Oct2022	Vanessa cardui	Ubx11c5	94	59	14	13	3	3.75-4.75	250 : 125	62.766
Amruta_3Oct2022	Vanessa cardui	Ubx11c5	74	40	13	13	1	3.75-4.75	250 : 125	54.0541
			168	99	27	26	4	3.75-4.75	250 : 125
KVH_17Jun2022	Vanessa cardui	Ubx11c5	62	22	9	9	2	0.5-0.75	500 : 250	35.4839
KVH_3Jun2022	Vanessa cardui	Ubx11c5	47	25	8	8	2	1.5-2h AEL	500 : 250	53.1915
Kelsey_29Sept2022	Vanessa cardui	Ubx11c5	84	68			1	2-3h	500 : 250	80.9524
			131	93	8	8	3	1.5-3	500 : 250

[truncated: 1 more sheets: CRE11]
